# Supplementary material
Source: PubMed Central journal article supplement (PMC5798338)

**Table S1. List of genes identified by *Tn* library screening, for intra-amoebal and/or intra-macrophage survival rates of less than 50%.**

| Mutant            | <i>M. abscessus</i><br>ATCC 19977      | <i>M. tuberculosis</i><br>H37Rv | Protein name                                                                                       | Amoeba<br>% survival | MΦ<br>% survival |
|-------------------|----------------------------------------|---------------------------------|----------------------------------------------------------------------------------------------------|----------------------|------------------|
| 37F10             | MAB_3756c                              | Rv3447c                         | EccC - Type VII secretion protein<br>FtsK/SpoIIIE family protein<br>(TA insertion 15bp after 24H3) | 9                    | >50              |
| 5A1               | MAB_3757                               | Rv3448                          | EccD - Type VII secretion protein                                                                  | 9                    | 26               |
| 7A1               | MAB_3757                               | Rv3448                          | EccD - Type VII secretion protein<br>(TA insertion 426bp after 5A1)                                | 9                    | 34               |
| 32C9 <sup>a</sup> | MAB_3759c                              | Rv3450c                         | EccB - Type VII secretion protein                                                                  | 11                   | 34               |
| 3B9               | MAB_0364c                              |                                 | ATPase, BadF/BadG/BcrA/BcrD type                                                                   | 12                   | 28               |
| 43A3 <sup>b</sup> | MAB_0628                               |                                 | EspI - Secretion protein                                                                           | 13                   | 8                |
| 24H3              | MAB_3756c                              | Rv3447c                         | EccC - Type VII secretion protein<br>FtsK/SpoIIIE family protein                                   | 17                   | >50              |
| 55F6              | MAB_0855                               |                                 | MmpL - Membrane protein                                                                            | 18                   | 36               |
| 14E9 <sup>c</sup> | MAB_3760                               |                                 | EccE* - Type VII secretion protein                                                                 | 25                   | 14               |
| 18D2              | MAB_3758                               | Rv3449                          | MycP - Serine protease                                                                             | 26                   | >50              |
| 13C3              | MAB_4938                               | Rv3911                          | SigM - RNA polymerase sigma factor                                                                 | 27                   | >50              |
| 30D4              | MAB_1027                               |                                 | Unknown                                                                                            | 32                   | >50              |
| 2E4               | MAB_1118c                              |                                 | Unknown                                                                                            | 35                   | >50              |
| 57C10             | Intergenic domain<br>(before MAB_4608) |                                 | ≈ 20 bp before 3-oxoacyl-ACP synthase FabF; β-ketoacyl-<br>ACP synthase II, KASII                  | 41                   | 49               |
| 47H4              | MAB_2436                               | Rv1860                          | ModD                                                                                               | 43                   | 18               |
| 56C2              | MAB_1314                               |                                 | Mesocentin                                                                                         | 46                   | 37               |
| 22H2              | MAB_1421                               | Rv1278                          | Unknown                                                                                            | 47                   | 24               |
| 27F10             | MAB_4558c                              |                                 | Membrane protein                                                                                   | 47                   | 38               |
| 22D4              | MYCMA_10265                            |                                 | Unknown                                                                                            | 49                   | 31               |
| 50C7              | MAB_0821                               |                                 | GabT - 4-aminobutyrate aminotransferase                                                            | >50                  | 8                |
| 29G1              | MAB_0431c                              | Rv3661                          | Inhibition of morphological differentiation protein                                                | >50                  | 13               |
| 50H8              | MAB_3787                               | Rv3399                          | S-adenosyl-L-methionine-dependent<br>methyltransferase                                             | >50                  | 26               |
| 57C7              | MAB_4626c                              | Rv0551c                         | FadD - Acyl-CoA synthetase                                                                         | >50                  | 33               |
| 24A4              | MAB_4302                               |                                 | Transmembrane protein DoxX                                                                         | >50                  | 33               |
| 47F1              | MAB_2752                               | Rv1458c                         | Spermidine/putrescine ABC transporter<br>ATP-binding protein                                       | >50                  | 33               |
| 51H1              | MAB_3800c                              |                                 | Glutamate dehydrogenase                                                                            | >50                  | 34               |
| 52B6              | MAB_1915                               |                                 | FadD - Fatty-acid-CoA ligase                                                                       | >50                  | 34               |
| 28B7              | MAB_2799                               |                                 | MspA                                                                                               | >50                  | 35               |
| 58E5              | MAB_0090c                              | Rv3085                          | EphD - Oxidoreductase                                                                              | >50                  | 35               |
| 29C8              | MAB_1911c                              | Rv3166c                         | Sugar phospho-transferase, transmembrane protein                                                   | >50                  | 36               |
| 27A9              | Not found                              |                                 | Unknown                                                                                            | >50                  | 36               |
| 51H4              | MYCMA_08185                            |                                 | Mammalian cell entry protein                                                                       | >50                  | 37               |

|              |                                                 |                |                                    |     |    |
|--------------|-------------------------------------------------|----------------|------------------------------------|-----|----|
| <b>51H7</b>  | <i>MAB_4691c</i>                                |                | PstA - Peptide synthetase          | >50 | 38 |
| <b>40A11</b> | <i>MAB_3658c</i>                                | <i>Rv3305c</i> | N-acyl-L-amino acid amidohydrolase | >50 | 40 |
| <b>15A11</b> | <i>MAB_3326c</i>                                | <i>Rv3329</i>  | Aminotransferase, class III        | >50 | 41 |
| <b>57G6</b>  | Intergenic domain<br>(before <i>MAB_3866c</i> ) |                | ≈ 90 nucleotides before a permease | >50 | 42 |
| <b>22D3</b>  | <i>MAB_2426</i>                                 | <i>Rv1851</i>  | UreF - Urease accessory protein    | >50 | 42 |
| <b>15C4</b>  | <i>MAB_2992c</i>                                | <i>Rv2689c</i> | 23S rRNA methyltransferase         | >50 | 45 |
| <b>39H12</b> | <i>MAB_4593c</i>                                |                | Unknown                            | >50 | 45 |
| <b>52A12</b> | <i>MAB_4173</i>                                 | <i>Rv3526</i>  | Oxygenase                          | >50 | 50 |

The mutants are classified according to their intracellular survival rate. Identical mutants (with the same TA insertion site) isolated several times: <sup>a</sup> duplications are 14B9, 19D4, 32C7, and 25E4; <sup>b</sup> duplications are 13F7 and 2D10; <sup>c</sup> duplication is 15G8. (\*) EccE was defined as described in (35).

**Table S2. Evaluation of the polar effect of *Tn* insertion. Genes mean normalized expression relative to *sigA*.**

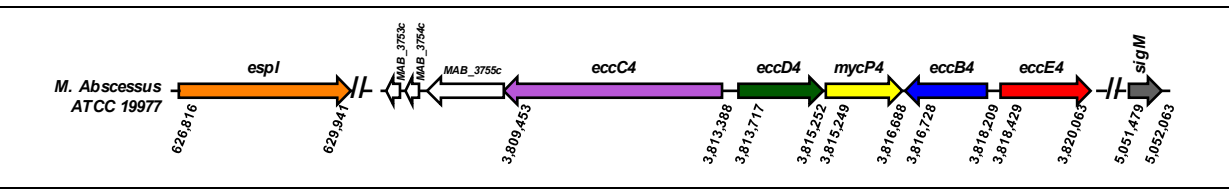

|                               | <b>Mabs<br/>43S</b> | <b>24H3<br/>(<i>Tn eccC4</i>)</b> | <b>7A1<br/>(<i>Tn eccD4</i>)</b> |
|-------------------------------|---------------------|-----------------------------------|----------------------------------|
| <i>MAB_3755c</i> <i>esx</i>   | 1.0                 | 1.2                               | ND                               |
| <i>MAB_3756c</i> <i>eccC4</i> | 1.0                 | 0.5                               | ND                               |
| <i>MAB_3757</i> <i>eccD4</i>  | 1.0                 | ND                                | 0.1                              |
| <i>MAB_3758</i> <i>mycP4</i>  | 1.0                 | ND                                | 1.9                              |
| <i>sigA</i>                   | 1.0                 | 1.0                               | 1.0                              |

**Table S3. List of proteins present only in wild-type strain compared to *ΔeccB4* strain (proteome UP000007137) and quantified by using quantification grouping XIC extraction.**

| Gene & Synonyms | Delta-ECCB4/WT |            |           |             |                  |            | Total Peptides | MW (kDa) | Description                                                                                                  |
|-----------------|----------------|------------|-----------|-------------|------------------|------------|----------------|----------|--------------------------------------------------------------------------------------------------------------|
|                 | Ratio          | Log2       | n-value   | Coeff. var. | Dist. pept. used | Pept. used |                |          |                                                                                                              |
| MAB 1372        | 0.6496537      | -0.6222572 | 0.3922764 | 0.9680881   | 5                | 35         | 35             | 50.8     | Probable sugar ABC transporter, sugar-binding protein LcaY                                                   |
| MAB 4240c       | 1.0072634      | 0.010441   | 0.9965026 | 1.838688    | 5                | 32         | 32             | 104.9    | Putative membrane protein, MmpL                                                                              |
| MAB 0719        | 0.5701225      | -0.810656  | 0.063134  | 0.3943692   | 3                | 24         | 24             | 58.0     | Putative oligopeptide ABC transporter, solute-binding protein                                                |
| MAB 2821c       | 0.8232974      | -0.2820924 | 0.8288937 | 0.6759251   | 3                | 22         | 22             | 42.8     | Coenzyme A biosynthesis bifunctional protein CnaBC                                                           |
| MAB 1340        | 0.931499       | -0.1023739 | 0.9447592 | 0.8373199   | 4                | 20         | 20             | 27.4     | Cytokinin riboside 5'-monophosphate phosphoribidylase                                                        |
| MAB 3014        | 0.7173365      | -0.4792781 | 0.8498491 | 1.6954196   | 3                | 19         | 19             | 49.1     | Putative FAD-dependent pyridine nucleotide-disulphide oxidoreductase, similar to mercuric reductases protein |
| MAB 2736c       | 1.2064554      | 0.2707746  | 0.6827613 | 0.6648359   | 3                | 18         | 18             | 58.6     | Probable macrolide ABC transporter, ATP-binding protein                                                      |
| MAB 0056c       | 1.1497825      | 0.2013609  | 0.9067549 | 1.2044549   | 2                | 16         | 16             | 144.6    | ATP-dependent helicase HrpA                                                                                  |
| MAB 0985        | 1.0448903      | 0.0633514  | 0.9504132 | 0.4838856   | 1                | 16         | 16             | 55.7     | Putative monoxygenase EihA                                                                                   |
| MAB 2977        | 0.7467379      | -0.4213261 | 0.8730468 | 1.9224785   | 2                | 16         | 16             | 53.4     | Uncharacterized protein                                                                                      |
| MAB 1418        | 0.5503971      | -0.8614551 | 0.2486619 | 0.6398666   | 2                | 16         | 16             | 18.3     | Uncharacterized protein                                                                                      |
| MAB 0855        | 0.9945128      | -0.0079382 | 0.9964129 | 0.2966129   | 2                | 15         | 15             | 111.2    | Putative membrane protein, MmpL family                                                                       |
| MAB 1160        | 0.7240453      | -0.465848  | 0.4917118 | 0.4292955   | 2                | 15         | 15             | 45.3     | Uncharacterized protein                                                                                      |
| xseA.MAB 12     | 0.7167715      | -0.4804149 | 0.9016702 | 2.6266578   | 2                | 15         | 15             | 44.3     | Exodeoxyribonuclease 7 large subunit                                                                         |
| MAB 0574c       | 1.0325039      | 0.0461472  | 0.9797785 | 1.2574889   | 2                | 14         | 14             | 25.0     | Uncharacterized protein                                                                                      |
| MAB 4204        | 0.6260738      | -0.6755954 | 0.6534113 | 1.1160815   | 2                | 14         | 14             | 73.3     | Amine oxidase                                                                                                |
| MAB 3285        | 0.4865464      | -1.0383806 | 0.4917118 | 1.0530711   | 1                | 14         | 14             | 19.0     | Uncharacterized protein                                                                                      |
| MAB 2533        | 0.6194847      | -0.6908593 | 0.3288841 | 0.3431699   | 1                | 12         | 12             | 9.9      | Uncharacterized protein                                                                                      |
| MAB 4180c       | 0.5885759      | -0.7646995 | 0.6817488 | 1.4375098   | 2                | 12         | 12             | 49.5     | Hypothetical MCE-family protein                                                                              |
| MAB 4336        | 0.5552355      | -0.8488284 | 0.5133653 | 0.356738    | 2                | 12         | 12             | 77.0     | Probable acyl-CoA dehydrogenase FadE                                                                         |
| MAB 2502        | 0.9249418      | -0.1125655 | 0.9623828 | 0.6517624   | 2                | 11         | 11             | 38.0     | Uncharacterized protein                                                                                      |
| MAB 4337        | 0.6903825      | -0.5345323 | 0.5669508 | 0.9169274   | 2                | 11         | 11             | 33.8     | Putative hydrolase, alpha/beta fold                                                                          |
| MAB 3759c       | 0.1405161      | -2.8311928 | 0.2323173 | 1.3772418   | 2                | 10         | 15             | 52.0     | Uncharacterized protein                                                                                      |
| MAB 2368        | 1.6615752      | 0.7325516  | 0.6199509 |             | 1                | 8          | 8              | 32.2     | Uncharacterized protein                                                                                      |
| MAB 0118c       | 1.5779745      | 0.6580739  | 0.4847307 |             | 1                | 8          | 8              | 23.0     | Superoxide dismutase                                                                                         |
| MAB 0636c       | 1.5396859      | 0.6226361  | 0.4665977 |             | 1                | 8          | 8              | 100.2    | Putative cation antiporter NADH dehydrogenase subunit                                                        |
| MAB 3373c       | 1.379172       | 0.4638024  | 0.5510935 |             | 1                | 8          | 8              | 31.8     | Uncharacterized protein                                                                                      |
| MAB 4906        | 1.3353332      | 0.4171998  | 0.115377  |             | 1                | 8          | 8              | 20.9     | Putative transcriptional regulator, PadR family                                                              |
| MAB 2106c       | 1.2798472      | 0.3559716  | 0.7958945 |             | 1                | 8          | 8              | 37.1     | Probable conserved lipoprotein LpplL                                                                         |
| MAB 2610        | 1.2385437      | 0.3086448  | 0.9038505 |             | 1                | 8          | 8              | 46.9     | Putative aminotransferase                                                                                    |
| MAB 1812c       | 1.1876447      | 0.2481033  | 0.8766006 |             | 1                | 8          | 8              | 11.3     | Uncharacterized protein                                                                                      |
| MAB 4086        | 1.1707961      | 0.2274899  | 0.8691924 |             | 1                | 8          | 8              | 27.2     | Possible TetR-family transcriptional regulator                                                               |
| MAB 4465        | 1.1650177      | 0.2203518  | 0.6086966 |             | 1                | 8          | 8              | 49.6     | Uncharacterized protein                                                                                      |
| MAB 1917        | 1.1587741      | 0.2125993  | 0.7923269 |             | 1                | 8          | 8              | 49.5     | Diacylglycerol O-acyltransferase                                                                             |
| MAB 1570        | 1.1027819      | 0.1411475  | 0.8895544 |             | 1                | 8          | 8              | 31.1     | Uncharacterized protein                                                                                      |
| MAB 1633        | 1.0588792      | 0.082538   | 0.9466742 |             | 1                | 8          | 8              | 33.3     | Putative DNA polymerase III delta subunit                                                                    |
| MAB 3776        | 1.0170017      | 0.0243221  | 0.9723147 |             | 1                | 8          | 8              | 17.8     | Uncharacterized protein                                                                                      |
| MAB 0948c       | 1.0101027      | 0.0145019  | 0.9902276 |             | 1                | 8          | 8              | 52.2     | Uncharacterized protein                                                                                      |
| MAB 0527c       | 0.9773886      | -0.0329559 | 0.9739455 |             | 1                | 8          | 8              | 43.3     | Possible monoxygenase (Luciferase-like)                                                                      |
| MAB 0291        | 0.9563647      | -0.0643672 | 0.9525471 |             | 1                | 8          | 8              | 67.2     | Uncharacterized protein                                                                                      |
| MAB 3423        | 0.9361515      | -0.0951861 | 0.9675525 |             | 1                | 8          | 8              | 55.9     | Probable cytochrome P450                                                                                     |
| MAB 3952        | 0.9345314      | -0.0976849 | 0.9485283 |             | 1                | 8          | 8              | 39.5     | Possible O-succinylbenzoic acid-CoA ligase MenE                                                              |
| MAB 1414c       | 0.896895       | -0.156989  | 0.9238506 |             | 1                | 8          | 8              | 68.6     | Probable ABC transporter, ATP-binding protein                                                                |
| MAB 2220c       | 0.8455928      | -0.241965  | 0.4969699 |             | 1                | 8          | 16             | 32.0     | Uncharacterized protein                                                                                      |
| MAB 2499c       | 0.832265       | -0.2648852 | 0.8872955 |             | 1                | 8          | 8              | 36.7     | Putative hydrolase, alpha/beta fold                                                                          |
| MAB 4682c       | 0.8231909      | -0.2824547 | 0.8451906 |             | 1                | 8          | 8              | 10.3     | Uncharacterized protein                                                                                      |
| MAB 4719c       | 0.8113779      | -0.3015154 | 0.8646435 |             | 1                | 8          | 8              | 73.2     | Uncharacterized protein                                                                                      |
| MAB 4796        | 0.7992279      | -0.3233212 | 0.8766006 |             | 1                | 8          | 8              | 35.4     | Uncharacterized protein                                                                                      |
| MAB 4635        | 0.7822857      | -0.3542325 | 0.8664635 |             | 1                | 8          | 8              | 44.9     | Probable NADH:flavin oxidoreductase/NADH oxidase                                                             |
| MAB 3908c       | 0.779623       | -0.3591514 | 0.5363251 |             | 1                | 8          | 8              | 42.1     | Uncharacterized protein                                                                                      |
| MAB 0795        | 0.7777886      | -0.3625501 | 0.493441  |             | 1                | 8          | 8              | 27.6     | Uncharacterized protein                                                                                      |
| MAB 0138        | 0.7752029      | -0.3673541 | 0.7414211 |             | 1                | 8          | 8              | 22.4     | Putative transcriptional regulator, TetR family                                                              |
| MAB 3583c       | 0.7451463      | -0.4244044 | 0.1530895 |             | 1                | 8          | 8              | 16.3     | Uncharacterized protein                                                                                      |
| MAB 3382c       | 0.7374432      | -0.4393961 | 0.8498491 |             | 1                | 8          | 8              | 27.6     | Probable enoyl-CoA hydratase/isomerase                                                                       |
| MAB 0654        | 0.7114393      | -0.4911875 | 0.4300089 |             | 1                | 8          | 8              | 33.1     | Uncharacterized protein                                                                                      |
| MAB 2855c       | 0.7080441      | -0.4980889 | 0.4888575 |             | 1                | 8          | 8              | 41.8     | Uncharacterized protein                                                                                      |
| MAB 2184        | 0.7038277      | -0.5067059 | 0.6501019 |             | 1                | 8          | 8              | 33.2     | Uncharacterized protein                                                                                      |
| MAB 4762        | 0.6663275      | -0.5856966 | 0.1928121 |             | 1                | 8          | 8              | 68.5     | Uncharacterized protein                                                                                      |
| MAB 0704c       | 0.6572947      | -0.6053877 | 0.6381113 |             | 1                | 8          | 8              | 37.2     | Uncharacterized protein                                                                                      |
| MAB 1650c       | 0.6388738      | -0.6463971 | 0.5275136 |             | 1                | 8          | 8              | 53.7     | Uncharacterized protein                                                                                      |
| MAB 0865c       | 0.6367983      | -0.6520662 | 0.697375  |             | 1                | 8          | 8              | 49.1     | Probable sugar-transport, intracellular membrane protein                                                     |
| MAB 2241        | 0.6330318      | -0.6596501 | 0.7095013 |             | 1                | 8          | 8              | 49.6     | Putative nitrate ABC transporter, periplasmic protein                                                        |
| MAB 0955c       | 0.6236522      | -0.6811864 | 0.6277257 |             | 1                | 8          | 16             | 50.6     | Probable sensor histidine kinase PrbB                                                                        |
| MAB 0708        | 0.6205949      | -0.6882762 | 0.192952  |             | 1                | 8          | 8              | 65.5     | Uncharacterized protein                                                                                      |
| MAB 1938c       | 0.6055386      | -0.7237091 | 0.4995978 |             | 1                | 8          | 8              | 22.8     | Putative transcriptional regulator, TetR family                                                              |
| MAB 2751        | 0.5991847      | -0.7389274 | 0.245589  |             | 1                | 8          | 8              | 63.6     | Uncharacterized protein                                                                                      |
| MAB 1489        | 0.5872276      | -0.7680084 | 0.4917118 |             | 1                | 8          | 8              | 64.2     | Probable acyl-CoA ligase FadD                                                                                |
| MAB 3344        | 0.5803566      | -0.7849886 | 0.1662721 |             | 1                | 8          | 8              | 66.3     | Probable glycosyl transferase                                                                                |
| MAB 4179c       | 0.5654113      | -0.8226273 | 0.2070673 |             | 1                | 8          | 8              | 43.1     | Uncharacterized protein                                                                                      |
| MAB p02         | 0.5467716      | -0.8709898 | 0.7081268 |             | 1                | 8          | 8              | 15.6     | Uncharacterized protein                                                                                      |
| MAB 0888c       | 0.5317647      | -0.91114   | 0.2323173 |             | 1                | 8          | 8              | 42.4     | Putative fumarylacetoacetase                                                                                 |
| MAB 2151c       | 0.5292579      | -0.9179571 | 0.2182385 |             | 1                | 8          | 8              | 52.4     | Putative cytochrome P450                                                                                     |
| MAB 4151c       | 0.5237772      | -0.9329749 | 0.2240795 |             | 1                | 8          | 8              | 37.9     | Hypothetical MCE-family protein                                                                              |
| MAB 0988c       | 0.5029013      | -0.9848128 | 0.0797285 |             | 1                | 8          | 8              | 16.6     | Probable membrane protein, MmpS                                                                              |
| MAB 4088c       | 0.4898363      | -1.0296283 | 0.3107978 |             | 1                | 8          | 8              | 15.1     | Uncharacterized protein                                                                                      |
| MAB 4460        | 0.4838248      | -1.0474433 | 0.0597673 |             | 1                | 8          | 8              | 23.8     | Uncharacterized protein                                                                                      |
| MAB 3114        | 0.4792158      | -1.0612526 | 0.3408009 |             | 1                | 8          | 8              | 44.7     | Uncharacterized protein                                                                                      |
| MAB 4387        | 0.4672615      | -1.097698  | 0.4071086 |             | 1                | 8          | 8              | 17.9     | Uncharacterized protein                                                                                      |
| MAB 2112        | 0.4630488      | -1.1107638 | 0.0359669 |             | 1                | 8          | 8              | 32.0     | Uncharacterized protein                                                                                      |
| MAB p15c        | 0.4187231      | -1.2559317 | 0.0597673 |             | 1                | 8          | 8              | 119.4    | TraA/ATP-dependent exonuclease/relaxase                                                                      |
| MAB 3790        | 0.4016635      | -1.3159407 | 0.1818956 |             | 1                | 8          | 8              | 56.9     | Uncharacterized protein                                                                                      |
| MAB 3855c       | 0.3895         | -1.3603046 | 0.0130044 |             | 1                | 8          | 8              | 18.9     | Putative lipoprotein LpPC                                                                                    |
| MAB 4546c       | 0.3740554      | -1.4186762 | 0.240118  |             | 1                | 8          | 8              | 26.1     | Putative TetR-family transcriptional regulator                                                               |
| MAB 1993        | 1.5941057      | 0.6274743  | 0.259769  |             | 1                | 7          | 7              | 35.4     | Methylenetetrahydrofolate reductase                                                                          |
| MAB 1399        | 1.2364216      | 0.3061708  | 0.8442147 |             | 1                | 7          | 7              | 45.1     | Probable peptidase                                                                                           |
| his1.MAB 264    | 1.1478122      | 0.1988866  | 0.9426841 |             | 1                | 7          | 7              | 12.5     | Phosphoribosyl-AMP cyclohydrolase                                                                            |
| MAB 3466c       | 0.9018817      | -0.1489899 | 0.8691924 |             | 1                | 7          | 7              | 5.4      | Uncharacterized protein                                                                                      |
| MAB 4325c       | 0.49549        | -1.0130722 | 0.3658655 |             | 1                | 7          | 7              | 36.6     | Uncharacterized protein                                                                                      |
| MAB 0965        | 0.4763755      | -1.0698388 | 0.2323173 |             | 1                | 7          | 7              | 39.4     | Putative lipase                                                                                              |
| MAB 4703c       | 0.4661445      | -1.1011508 | 0.552147  |             | 1                | 7          | 7              | 103.2    | Probable membrane protein, MmpL                                                                              |
| MAB 0107c       | 0.7943708      | -0.3321154 | 0.822221  |             | 1                | 6          | 6              | 16.4     | 4-hydroxy-4-methyl-2-oxoglutarate aldolase                                                                   |
| MAB 1314        | 0.5754183      | -0.797317  | 0.6989942 |             | 1                | 6          | 6              | 23.5     | Uncharacterized protein                                                                                      |
| MAB 4383c       | 0.2181577      | -2.196557  | 0.0359669 |             | 1                | 6          | 6              | 15.3     | Putative membrane protein, MmpS                                                                              |
| MAB 4531        | 1.1635206      | 0.2184968  | 0.9447592 |             | 1                | 5          | 5              | 16.0     | Uncharacterized protein                                                                                      |
| MAB 3366        | 0.7721405      | -0.3730648 | 0.8930716 |             | 1                | 5          | 5              | 44.8     | Possible glycosyl transferase                                                                                |
| MAB 4306        | 0.4388274      | -1.1882746 | 0.1762696 |             | 1                | 5          | 5              | 28.8     | Putative transglutaminase-like protein                                                                       |
| MAB 4511c       | 0.1436602      | -2.7992676 | 0.2601116 |             | 1                | 5          | 5              | 44.0     | Putative Mce family protein                                                                                  |
| MAB 0664        | 0.1143057      | -3.1293005 | 0.3844635 |             | 1                | 5          | 5              | 9.8      | PE family protein                                                                                            |
| MAB 2102        | 1000           | 1000       |           |             | 1                | 4          | 4              | 48.4     | Probable peptidase                                                                                           |
| MAB 2934        | 2.1097025      | 1.0770396  | 0.4555747 |             | 1                | 4          | 4              | 25.7     | Probable Asp/Glu racemase                                                                                    |
| MAB 3901        | 1.9740702      | 0.9811733  | 0.7617026 |             | 1                | 4          | 4              | 19.6     | Peptidase C56 PfpI                                                                                           |
| MAB 0299c       | 0.4734197      | -1.0788084 | 0.5554235 |             | 1                | 4          | 4              | 12.0     | Uncharacterized protein                                                                                      |
| MAB 4141        | 0.3683975      | -1.4410173 | 0.3533305 |             | 1                | 4          | 4              | 55.1     | PE/PPE family protein                                                                                        |
| MAB 2270c       | 0.001          | -1000      |           |             | 1                | 4          | 4              | 43.4     | Putative peroxidase                                                                                          |
| MAB 3970c       | 0.001          | -1000      |           |             | 1                | 3          | 3              | 12.1     | Uncharacterized protein                                                                                      |
| MAB 3354        | 0.001          | -1000      |           |             | 1                | 2          | 2              | 37.8     | Probable acyl-L-acyl-carrier protein] desaturase DesA1                                                       |
| MAB 2287        | 0.001          | -1000      |           |             | 1                | 1          | 1              | 27.7     | Putative metal dependent phosphohydrolase                                                                    |
| MAB 2989        | 0.001          | -1000      |           |             | 1                | 1          | 1              | 26.2     | Chloramphenicol acetyltransferase                                                                            |
| MAB 1820c       | 0.001          | -1000      |           |             | 1                | 1          | 1              | 21.8     | Putative resolvase                                                                                           |

**Table S4. List of proteins present only in wild-type strain compared to *ΔeccB4* strain (proteome UP0000038470) and quantified by using quantification grouping XIC extraction.**

| 120/166 proteins | Delta-ECCB4/WT |            |           |             |                  | Total Peptides | MW (kD) | Description |                                                                                                              |
|------------------|----------------|------------|-----------|-------------|------------------|----------------|---------|-------------|--------------------------------------------------------------------------------------------------------------|
|                  | Ratio          | Log2       | p-value   | Coeff. var. | Dist. pept. used |                |         |             |                                                                                                              |
| AA00U0XHK9       | 0.6516033      | -0.6179341 | 0.4095446 | 0.9694194   | 5                | 35             | 35      | 50.8        | Probable sugar ABC transporter, sugar-binding protein LpaY                                                   |
| AA00U1A6G4       | 0.8251966      | -0.2771900 | 0.8350575 | 0.6780384   | 3                | 22             | 22      | 42.8        | Coenzyme A biosynthesis bifunctional protein CoaBC                                                           |
| AA00U0ZYQ4       | 1.3023717      | 0.381412   | 0.9179987 | 2.2820302   | 3                | 21             | 29      | 106.8       | Membrane protein mmp10                                                                                       |
| AA00U1DWS8       | 0.9258249      | -0.0956895 | 0.9417481 | 0.8365823   | 4                | 20             | 20      | 27.4        | Cytokinin riboside 5'-monophosphate phosphoribohydrolase                                                     |
| AA00U0ZFD4       | 1.2092983      | 0.2747901  | 0.6572382 | 0.6708797   | 3                | 18             | 18      | 58.6        | ABC transporter                                                                                              |
| AA00U0ZFE5       | 1.1976146      | 0.2601639  | 0.8385813 | 0.8409254   | 2                | 16             | 16      | 21.6        | Putative transcriptional regulator, TetR family                                                              |
| AA00U1AV71       | 1.152064       | 0.2042208  | 0.9179987 | 1.2044549   | 2                | 16             | 16      | 144.2       | ATP-dependent helicase HrpA                                                                                  |
| AA00U1A2Y2       | 1.1232806      | 0.1677184  | 0.9320953 | 1.0041597   | 2                | 16             | 16      | 25.8        | L-hydroxy-tetrahydrodipicolinate reductase                                                                   |
| AA00U1ADX3       | 1.0469636      | 0.0662113  | 0.9420111 | 0.4838856   | 1                | 16             | 16      | 55.7        | Putative monooxygenase EthA                                                                                  |
| AA00U1A421       | 0.7482196      | -0.4184663 | 0.8781956 | 1.9224785   | 2                | 16             | 16      | 53.4        | Hydrolase                                                                                                    |
| AA00U1AQ08       | 0.669483       | -0.5788808 | 0.4465197 | 0.4718889   | 2                | 16             | 16      | 56.1        | D,D-dipeptide-binding periplasmic protein ddaA                                                               |
| AA00U1A4L4       | 1.4984728      | 0.1174199  | 0.9589852 | 1.3032107   | 2                | 15             | 15      | 57.4        | Uncharacterized protein containing a von Willebrand factor type A (VWA) domain                               |
| AA00U0YSW0       | 0.7253176      | -0.4635153 | 0.4888152 | 0.4294923   | 2                | 15             | 15      | 44.5        | Uncharacterized protein                                                                                      |
| AA00U1A3F3       | 0.988442       | -0.0167717 | 0.9982928 | 1.9815678   | 2                | 13             | 13      | 49.1        | Putative FAD-dependent pyridine nucleotide-disulphide oxidoreductase, similar to mercuric reductases protein |
| AA00U0ZY15       | 0.3376304      | -1.5664833 | 0.2664075 | 1.4703604   | 2                | 13             | 13      | 30.3        | Uncharacterized protein                                                                                      |
| AA00U1AXX2       | 0.6210686      | -0.6871754 | 0.3327292 | 0.3442104   | 1                | 12             | 12      | 11.5        | Conserved exported protein of uncharacterized function                                                       |
| AA00U0ZYZ7       | 0.591489       | -0.7575768 | 0.6858724 | 1.4405969   | 2                | 12             | 12      | 49.6        | Hypothetical MCE-family protein                                                                              |
| AA00U0W TG6      | 0.1407043      | -2.829261  | 0.2378297 | 1.3786172   | 2                | 10             | 15      | 52.0        | ESX-4 secretion system protein eccB4                                                                         |
| AA00U1APU1       | 1.7021308      | 0.7673385  | 0.1005493 |             | 1                | 8              | 8       | 25.0        | Uncharacterized protein                                                                                      |
| AA00U1T2V0       | 1.6648723      | 0.754115   | 0.6273841 |             | 1                | 8              | 8       | 32.2        | Segregation and condensation protein A                                                                       |
| AA00U1AEF5       | 1.6429364      | 0.7162767  | 0.744083  |             | 1                | 8              | 8       | 15.9        | Probable molybdenum biosynthesis protein Mog                                                                 |
| AA00U1AVW0       | 1.5811056      | 0.6609338  | 0.4656354 |             | 1                | 8              | 8       | 23.0        | Superoxide dismutase                                                                                         |
| AA00U1A870       | 1.5296279      | 0.6131808  | 0.7276229 |             | 1                | 8              | 8       | 30.1        | Putative short chain dehydrogenase/reductase                                                                 |
| AA00U0ZAZ3       | 1.3556631      | 0.4389987  | 0.6934538 |             | 1                | 8              | 8       | 22.0        | Possible transposase fusion protein                                                                          |
| AA00U1BK86       | 1.3379829      | 0.4200597  | 0.4112906 |             | 1                | 8              | 8       | 26.9        | Paik family transcriptional regulator                                                                        |
| AA00U1AG97       | 1.2823868      | 0.588831   | 0.7837886 |             | 1                | 8              | 8       | 36.4        | Probable conserved lipoprotein LplL                                                                          |
| AA00U1A0Z5       | 1.2691444      | 0.3438562  | 0.7060058 |             | 1                | 8              | 8       | 40.5        | Putative dihydrodipicolinate reductase                                                                       |
| AA00U1B373       | 1.2014456      | 0.2647713  | 0.6709206 |             | 1                | 8              | 8       | 48.8        | Putative manganese-dependent inorganic pyrophosphatase                                                       |
| AA00U0XGZ3       | 1.1975807      | 0.2601290  | 0.589263  |             | 1                | 8              | 8       | 38.0        | Glutamate 5-kinase                                                                                           |
| AA00U1AVB6       | 1.1953024      | 0.2573757  | 0.9320953 |             | 1                | 8              | 8       | 38.1        | Topoisomerase IB                                                                                             |
| AA00U1AL6        | 1.1826384      | 0.2428208  | 0.6720268 |             | 1                | 8              | 8       | 31.2        | ESX1 C-terminal conserved region                                                                             |
| AA00U0ZXY2       | 1.1731193      | 0.232497   | 0.8556901 |             | 1                | 8              | 8       | 26.9        | Possible TetR family transcriptional regulator                                                               |
| AA00U0WM26       | 1.1673294      | 0.2321172  | 0.616595  |             | 1                | 8              | 8       | 49.6        | Uncharacterized protein                                                                                      |
| AA00U1ASW6       | 1.165761       | 0.2212721  | 0.8486992 |             | 1                | 8              | 8       | 26.4        | ABC transporter, ATP-binding protein                                                                         |
| AA00U1A7K6       | 1.1610734      | 0.2154592  | 0.7785398 |             | 1                | 8              | 8       | 49.4        | Diacylglycerol O-acyltransferase                                                                             |
| AA00U1AQ08       | 1.1267126      | 0.1721195  | 0.8154307 |             | 1                | 8              | 8       | 45.2        | Probable aminotransferase/cysteine desulfurase                                                               |
| AA00U1TK9        | 1.1248312      | 0.1697086  | 0.9179987 |             | 1                | 8              | 8       | 16.4        | AsnC family transcriptional regulator                                                                        |
| AA00U1AC36       | 1.119779       | 0.163214   | 0.9179987 |             | 1                | 8              | 8       | 39.4        | Uncharacterized protein                                                                                      |
| AA00U0ZFE4       | 1.048109       | 0.0677888  | 0.9179987 |             | 1                | 8              | 8       | 36.8        | UDP-glucose 4,6-dehydratase                                                                                  |
| AA00U0ZYZ9       | 1.0358238      | 0.0507786  | 0.9557204 |             | 1                | 8              | 8       | 40.9        | Probable glycylglycyl transferase                                                                            |
| AA00U0ZYY9       | 1.0190197      | 0.027182   | 0.9697378 |             | 1                | 8              | 8       | 17.8        | Uncharacterized protein                                                                                      |
| AA00U1B2F8       | 1.0069365      | 0.0099727  | 0.9552523 |             | 1                | 8              | 8       | 51.4        | rRNA modification GTPase MnmE                                                                                |
| AA00U1AE7        | 0.9609903      | -0.0587581 | 0.9677545 |             | 1                | 8              | 8       | 43.1        | Flavin-dependent monooxygenase, oxycarenase subunit HsaA                                                     |
| AA00U1A1Z9       | 0.9598224      | -0.0615074 | 0.9585042 |             | 1                | 8              | 8       | 39.6        | Uncharacterized protein                                                                                      |
| AA00U0ZAD0       | 0.9363858      | -0.0948785 | 0.9434306 |             | 1                | 8              | 8       | 39.4        | Possible O-succinylbenzoic acid-CoA ligase MenE                                                              |
| AA00U0ZYP6       | 0.8859952      | -0.1746292 | 0.9309936 |             | 1                | 8              | 8       | 55.0        | Probable aldehyde dehydrogenase                                                                              |
| AA00U1ARA8       | 0.8780524      | -0.187621  | 0.6868324 |             | 1                | 8              | 8       | 54.0        | Ecopolysaccharide biosynthesis polyphosphoryl glycosylphosphotransferase                                     |
| AA00U1B4D4       | 0.8677466      | -0.2046543 | 0.9179323 |             | 1                | 8              | 8       | 57.7        | Primase C terminal 1 (PriC-T1)                                                                               |
| AA00U0ZX17       | 0.8670776      | -0.205767  | 0.9275237 |             | 1                | 8              | 8       | 31.1        | Uncharacterized protein                                                                                      |
| AA00U1AHX6       | 0.8472707      | -0.2391051 | 0.4888152 |             | 1                | 8              | 8       | 37.0        | Uncharacterized protein                                                                                      |
| AA00U1BE33       | 0.814133       | -0.2490791 | 0.8253962 |             | 1                | 8              | 8       | 45.8        | N-isopropylamide isopropyl amidohydrolase                                                                    |
| AA00U0ZWX1       | 0.8738224      | -0.2795948 | 0.8411385 |             | 1                | 8              | 8       | 10.4        | Uncharacterized protein                                                                                      |
| AA00U1ARX7       | 0.8138427      | -0.2971782 | 0.6112286 |             | 1                | 8              | 8       | 22.9        | Pyridoxone-carboxylate peptidase                                                                             |
| AA00U1AMZ3       | 0.8109656      | -0.3028741 | 0.8603658 |             | 1                | 8              | 8       | 137.2       | Uncharacterized protein                                                                                      |
| AA00U1AEH7       | 0.8008138      | -0.3204613 | 0.884889  |             | 1                | 8              | 8       | 35.4        | Alpha/beta hydrolase                                                                                         |
| AA00U0ZQ0        | 0.7967938      | -0.327216  | 0.8384338 |             | 1                | 8              | 8       | 41.1        | Putative Mce family protein                                                                                  |
| AA00U1AL63       | 0.7793819      | -0.3594903 | 0.83833   |             | 1                | 8              | 8       | 26.7        | Uncharacterized protein                                                                                      |
| AA00U1ATX3       | 0.7676741      | -0.3649471 | 0.7396307 |             | 1                | 8              | 8       | 22.4        | Putative transcriptional regulator, TetR family                                                              |
| AA00U1AJ27       | 0.7389065      | -0.4365362 | 0.8486992 |             | 1                | 8              | 8       | 27.8        | Probable enol-CoA hydratase/isomerase                                                                        |
| AA00U1AVG2       | 0.7363624      | -0.4415122 | 0.3056219 |             | 1                | 8              | 8       | 32.0        | Putative pyruvate, phosphate dikinase regulatory protein                                                     |
| AA00U1APD9       | 0.712851       | -0.4883276 | 0.4239446 |             | 1                | 8              | 8       | 33.1        | Membrane protein                                                                                             |
| AA00U1AMS0       | 0.7119051      | -0.4902431 | 0.3217986 |             | 1                | 8              | 8       | 24.3        | Acid phosphatase                                                                                             |
| AA00U1B073       | 0.7084984      | -0.4971634 | 0.7252589 |             | 1                | 8              | 8       | 11.8        | Uncharacterized protein                                                                                      |
| AA00U1B3H5       | 0.7084984      | -0.4971634 | 0.7252589 |             | 1                | 8              | 8       | 68.1        | Heavy metal transcriptional P-urea ATPase                                                                    |
| AA00U1AXQ3       | 0.7060639      | -0.5021293 | 0.7895929 |             | 1                | 8              | 8       | 51.4        | rRNA/rDNA cytosine-C5-methylase                                                                              |
| AA00U1AFS1       | 0.7052243      | -0.503846  | 0.6708058 |             | 1                | 8              | 8       | 33.2        | Cullin, a subunit of E3 ubiquitin ligase                                                                     |
| AA00U0ZVK0       | 0.700045       | -0.5144801 | 0.5168702 |             | 1                | 8              | 8       | 51.2        | Probable aldehyde dehydrogenase                                                                              |
| AA00U1AAM6       | 0.6946548      | -0.5256319 | 0.399609  |             | 1                | 8              | 8       | 46.5        | Uncharacterized protein                                                                                      |
| AA00U1B80        | 0.6826891      | -0.5560993 | 0.3729399 |             | 1                | 8              | 8       | 46.0        | Prophage integrase                                                                                           |
| AA00U1AL9        | 0.6676497      | -0.5828865 | 0.1939099 |             | 1                | 8              | 8       | 65.8        | ABC transporter                                                                                              |
| AA00U1A58        | 0.6601415      | -0.643372  | 0.527385  |             | 1                | 8              | 8       | 53.8        | Putative secreted protein                                                                                    |
| AA00U1A3N1       | 0.637631       | -0.6492063 | 0.7041882 |             | 1                | 8              | 8       | 49.1        | Probable sugar-transport integral membrane protein                                                           |
| AA00U1A797       | 0.6067402      | -0.7208493 | 0.493833  |             | 1                | 8              | 8       | 22.7        | Putative transcriptional regulator, TetR family                                                              |
| AA00U0ZW29       | 0.591578       | -0.7573596 | 0.0513261 |             | 1                | 8              | 8       | 34.0        | Putative hydrolase, alpha-beta fold                                                                          |
| AA00U1ARV1       | 0.5815082      | -0.7821287 | 0.1825567 |             | 1                | 8              | 8       | 66.3        | Mannosyltransferase yycA                                                                                     |
| AA00U1ATU3       | 0.5712956      | -0.8076089 | 0.1664263 |             | 1                | 8              | 8       | 37.7        | Uncharacterized protein                                                                                      |
| AA00U0ZM5        | 0.5666333      | -0.8197671 | 0.2013371 |             | 1                | 8              | 8       | 43.2        | Uncharacterized protein                                                                                      |
| AA00U1B30        | 0.5633255      | -0.8279594 | 0.1327773 |             | 1                | 8              | 8       | 17.1        | Single-stranded DNA-binding protein                                                                          |
| AA00U1ALX1       | 0.5377925      | -0.8948785 | 0.0279107 |             | 1                | 8              | 8       | 33.6        | Pseudouridine synthase                                                                                       |
| AA00U1BPT3       | 0.5248165      | -0.930115  | 0.3378297 |             | 1                | 8              | 8       | 37.5        | Hypothetical MCE-family protein                                                                              |
| AA00U1A2H3       | 0.522485       | -0.936385  | 0.47399   |             | 1                | 8              | 8       | 13.6        | Uncharacterized protein                                                                                      |
| AA00U1A8T5       | 0.507781       | -0.9778436 | 0.032732  |             | 1                | 8              | 8       | 21.4        | Uncharacterized protein                                                                                      |
| AA00U1AF41       | 0.506239       | -0.9819529 | 0.077768  |             | 1                | 8              | 8       | 16.1        | Probable membrane protein, MmpS                                                                              |
| AA00U1B30        | 0.4978637      | -1.0001721 | 0.1852297 |             | 1                | 8              | 8       | 139.0       | ATP-dependent helicase/deoxyribonuclease subunit B                                                           |
| AA00U1AWK0       | 0.464268       | -1.069702  | 0.4922793 |             | 1                | 8              | 8       | 89.8        | Probable phosphotetrase                                                                                      |
| AA00U1AFZ5       | 0.4639676      | -1.0709309 | 0.0341203 |             | 1                | 8              | 8       | 31.9        | Uncharacterized protein                                                                                      |
| AA00U1AJM3       | 0.4561322      | -1.1324729 | 0.493833  |             | 1                | 8              | 8       | 65.4        | ABC transporter, transmembrane region                                                                        |
| AA00U1BOT1       | 0.4493854      | -1.1539748 | 0.2218203 |             | 1                | 8              | 8       | 69.3        | N-acetylmuramoyl-L-alanine amidase domain-containing protein SAOUHSC_02979                                   |
| AA00U1AV37       | 0.4077229      | -1.2943056 | 0.0126321 |             | 1                | 8              | 8       | 42.0        | Eflux transporter, RND family, MFP subunit                                                                   |
| AA00U0ZXM6       | 0.3902729      | -1.3744471 | 0.0126321 |             | 1                | 8              | 8       | 19.0        | Putative lipoprotein LipC                                                                                    |
| AA00U0ZYT1       | 0.3747976      | -1.4158163 | 0.2469415 |             | 1                | 8              | 8       | 27.3        | HTH-type transcriptional regulator                                                                           |
| AA00U1AD19       | 0.3624978      | -1.4639558 | 0.0893864 |             | 1                | 8              | 8       | 64.7        | Fibronectin-binding protein A-N-terminus (FbpA)                                                              |
| AA00U1AC13       | 0.3025407      | -1.7247991 | 0.2931233 |             | 1                | 8              | 8       | 21.7        | Two-component system response regulator                                                                      |
| AA00U1AGN3       | 1.6040163      | 0.6818888  | 0.2585021 |             | 1                | 7              | 7       | 35.4        | Methylenetetrahydrofolate reductase                                                                          |
| AA00U1A8K3       | 1.2594988      | 0.3097569  | 0.8330575 |             | 1                | 7              | 7       | 45.2        | Probable peptidase                                                                                           |
| AA00U1ALH4       | 1.190576       | 0.2515598  | 0.8330575 |             | 1                | 7              | 7       | 29.3        | Phosphomethylpyrimidine kinase                                                                               |
| AA00U1AE18       | 0.4793371      | -1.0608874 | 0.738235  |             | 1                | 7              | 7       | 41.8        | Putative ligase                                                                                              |
| AA00U1AYD9       | 1.685964       | 0.7532591  | 0.8183341 |             | 1                | 6              | 14      | 20.6        | Fimbrial isopeptide formation D2 domain                                                                      |
| AA00U1AUV6       | 1.3823432      | 0.4671158  | 0.8411385 |             | 1                | 6              | 6       | 60.4        | Putative 3-keetopirid-1-dehydrogenase of fumarate reductase/succinate dehydrogenase                          |
| AA00U0ZYS5       | 1.2743253      | 0.3497336  | 0.9019967 |             | 1                | 6              | 6       | 15.4        | Uncharacterized protein                                                                                      |
| AA00U1AVS9       | 0.801601       | -0.3190438 | 0.8330575 |             | 1                | 6              | 6       | 16.4        | L-hydroxy-L-methyl-2-oxoglutarate aldolase                                                                   |
| AA00U0ZXP3       | 0.6437311      | -0.63547   | 0.8272281 |             | 1                | 6              | 6       | 76.9        | Probable acyl-CoA dehydrogenase FadE                                                                         |
| AA00U1BYE9       | 0.5574775      | -0.8430161 | 0.2359601 |             | 1                | 6              | 6       | 46.6        | Acyl-CoA dehydrogenase                                                                                       |
| AA00U0ZG2        | 0.428444       | -1.2228215 | 0.2680524 |             | 1                | 6              | 6       | 73.3        | Amine oxidase                                                                                                |
| AA00U1A400       | 0.379926       | -1.3962096 | 0.1825567 |             | 1                | 6              | 6       | 27.6        | Putative short-chain dehydrogenase/reductase                                                                 |
| AA00U1B3W2       | 0.3425718      | -1.545218  | 0.4664508 |             | 1                | 6              | 6       | 79.7        | ABC-type amino acid transport system, permease and periplasmic component                                     |
| AA00U0ZW57       | 0.2194704      | -2.1879017 | 0.0326167 |             | 1                | 6              | 6       | 15.4        | Putative membrane protein, MmpS                                                                              |
| AA00U0ZVF7       | 1.1693681      | 0.2257292  | 0.939024  |             | 1                | 5              | 5       | 16.1        | Uncharacterized protein                                                                                      |
| AA00U1ALV6       | 0.8313736      | 0.2878231  | 0.43738   |             | 1                | 5              | 5       | 23.6        | Chromosomal partition ATPase protein                                                                         |
| AA00U0IYL5       | 0.7774957      | -0.363935  | 0.9089657 |             | 1                | 5              | 5       | 44.8        | Glycerol synthase                                                                                            |
| AA00U1BKT2       | 0.4403966      | -1.1831248 | 0.1822436 |             | 1                | 5              | 5       | 28.9        | Putative transglutaminase-like protein                                                                       |
| AA00U0ZVV2       | 0.1435321      | -2.800552  | 0.2637772 |             | 1                | 5              | 5       | 44.1        | Putative Mce family protein                                                                                  |
| AA00U1ARH8       | 0.1152733      | -3.1168695 | 0.4020695 |             | 1                | 5              | 5       | 9.8         | PE family protein                                                                                            |
| AA00U1AG29       | 1000           | 1000       |           |             | 1                | 4              | 4       | 48.3        | Succinyl-diaminopimelate desuccinylase                                                                       |
| AA00U1AR2        | 2.1220613      | 1.48858    |           |             |                  |                |         |             |                                                                                                              |

In our Label-free protein quantification approach to build up both Tables S3 and S4, we used the Quantification grouping XIC extraction, and the option Matching between runs from MaxQuant, which is an option forcing the match between runs. The information of the runs regarding the identifications from one run will be used to screen another run looking for peptide peaks closely located in the same retention time range. Match between runs is used to boost number of identifications, meaning for peptides, which are present in several samples, but not identified via the MS/MS data search in all of them, can still be identified via matching between runs. In the case of EccB<sub>4</sub>, which was not identified in the LC-MS/MS search of the  $\Delta$ -eccB<sub>4</sub> sample, the option match between runs could extract in the 4 replicates only one peptide (and not the same one) in 3 of the 4 replicates. In our MS criteria, 1 peptide is not enough to identify a protein but with this option we could have quantifications and not only absent/present values.

**Table S5. Primers used in RT-qPCR.**

|                      |              |                         |
|----------------------|--------------|-------------------------|
| <i>sigA F</i>        |              | TCCGAGAAAGACAAGGCTTC    |
| <i>sigA R</i>        |              | CCAGCTCGACTTCCTCTCG     |
| <i>MYCMA_05485 F</i> | <i>esx</i>   | GTCCCGTCTCGCGCCCTGTG    |
| <i>MYCMA_05485 R</i> | <i>esx</i>   | ACCGCACCGTCAACGTCGCA    |
| <i>MYCMA_2064 F</i>  | <i>eccC4</i> | GCCATCGGTGTGCCGGATGC    |
| <i>MYCMA_2064 R</i>  | <i>eccC4</i> | CACCACTTCGGCGGGTCGCA    |
| <i>MYCMA_2065 F</i>  | <i>eccD4</i> | AACGGCGGAAAAGCCCACGG    |
| <i>MYCMA_2065 R</i>  | <i>eccD4</i> | GGGTGCCTCGGTCTGCGGG     |
| <i>MYCMA_2066 F</i>  | <i>mycP4</i> | GTCGTCGTGGTGGTGGCAGC    |
| <i>MYCMA_2066 R</i>  | <i>mycP4</i> | GCCGCCGAGACTGAATTTGGACG |

**Fig. S1. Visual first round of screening of the transposon library for reduced intracellular survival in amoeba and evaluation of mycobacterial adhesion to and internalization in MΦ.**

(A) Examples of mutants identified are highlighted with a white circle and are named according to the plate number and location in the 96-well plates of the original library. For comparison a non-selected mutant is shown with a black circle. (B) The *in vitro* growth of the selected mutants with a reduced ability to survive in amoeba was next checked. Growth was assessed by measuring the OD of the cultures at 600 nm every 2 days. (C) Adhesion assay (left): The different mycobacterial strains were added to a 24-wells plate containing J774.2 MΦ cells. The plate was centrifuged to allow the bacteria to reach the monolayer and incubated 30 min. on ice. After 2 washes, the cells were lysed and the number of bacteria that had adhered to the MΦ were enumerated by CFU counting. Internalization assay (right): J774.2 MΦ cells were infected with the different mycobacterial strains during 1 hr at a MOI 10:1 at 37°C. After 3 washes to eliminated extracellular mycobacteria, the number of internalized bacteria were enumerated by CFU counting. Histograms and error bars represent means  $\pm$  SD that are representative data of three independent experiments. Statistical analysis: Unpaired *t* test using GraphPad prism program, ns non-significant.



Fig.S1

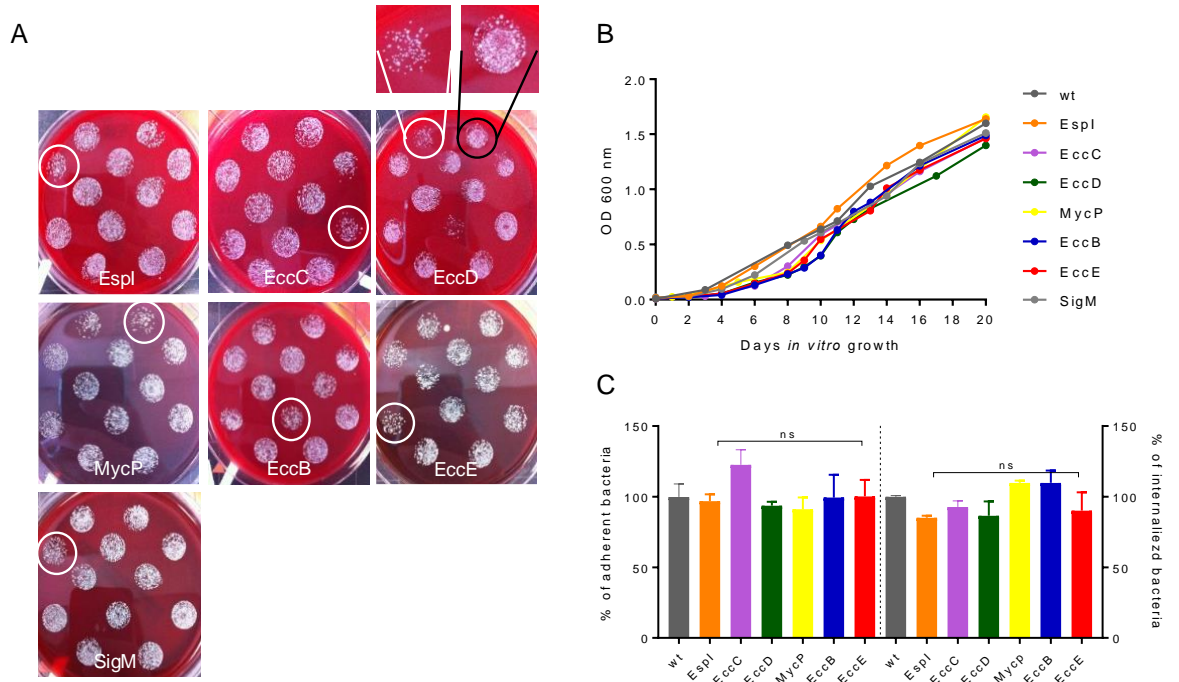

**Fig. S2. Construction of the *M. abscessus* KO mutant strain  $\Delta eccB_4$  by homologous recombination.** (A) *M. abscessus*  $\Delta eccB_4$  KO mutant was constructed by first preparing the Allelic Exchange Substrate (AES) fragment, which contains an antibiotic resistance cassette (the zeocin resistance gene *ble* of *Streptoalloteichus hindustanus*) flanked by 1,000 bp of the DNA upstream and downstream of the target gene *eccB<sub>4</sub>*. Homologous recombination with *M. abscessus* chromosome occurred upon electroporation of the AES fragment into *M. abscessus* wild-type (wt) containing the recombineering plasmid pJV53K, which was lost after plating the colonies in media without kanamycin. (B) PCR was performed to check the deletion of *eccB<sub>4</sub>* by homologous recombination. Primers are identified by arrows (primers F and R). (C) *In vitro* growth curves estimated by spectrophotometry (OD 600<sub>nm</sub>) of *M. abscessus* MabsCIP (wt),  $\Delta eccB_4$ , and *C.ΔeccB<sub>4</sub>* strains.

Fig.S2

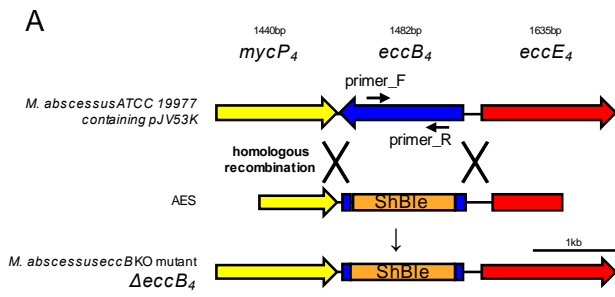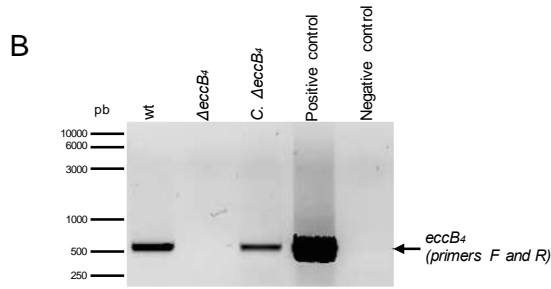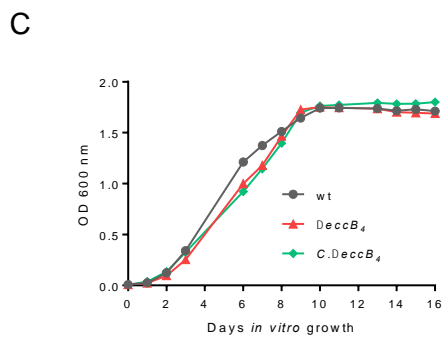

**Fig. S3. Evaluation of mycobacterial adhesion and internalization on amoeba (A, C) or MΦ (B, D).** (A, B) The different mycobacterial strains wild-type (wt),  $\Delta eccB_4$  and  $C.\Delta eccB_4$  were added to a 24-wells plate containing *A. castellanii* amoeba or J774.2 MΦ cells. The plate was centrifuged to allow the bacteria to reach the monolayer and incubated 30 min on ice. After 2 washes, the cells were lysed and the number of bacteria which have adhered to the amoeba or MΦ were enumerated evaluating CFU. (C, D) *A. castellanii* amoeba or J774.2 MΦ cells were infected with wild-type (wt),  $\Delta eccB_4$  and  $C.\Delta eccB_4$  during 1 h at a MOI 10:1 at 37°C. After 3 washes to eliminated extracellular mycobacteria, the number of internalized bacteria was evaluated counting CFU. Histograms and error bars represent means  $\pm$  SD that are representative data of three independent experiments. Statistical analysis: Unpaired *t* test using GraphPad prism program, ns non-significant.

Fig.S3

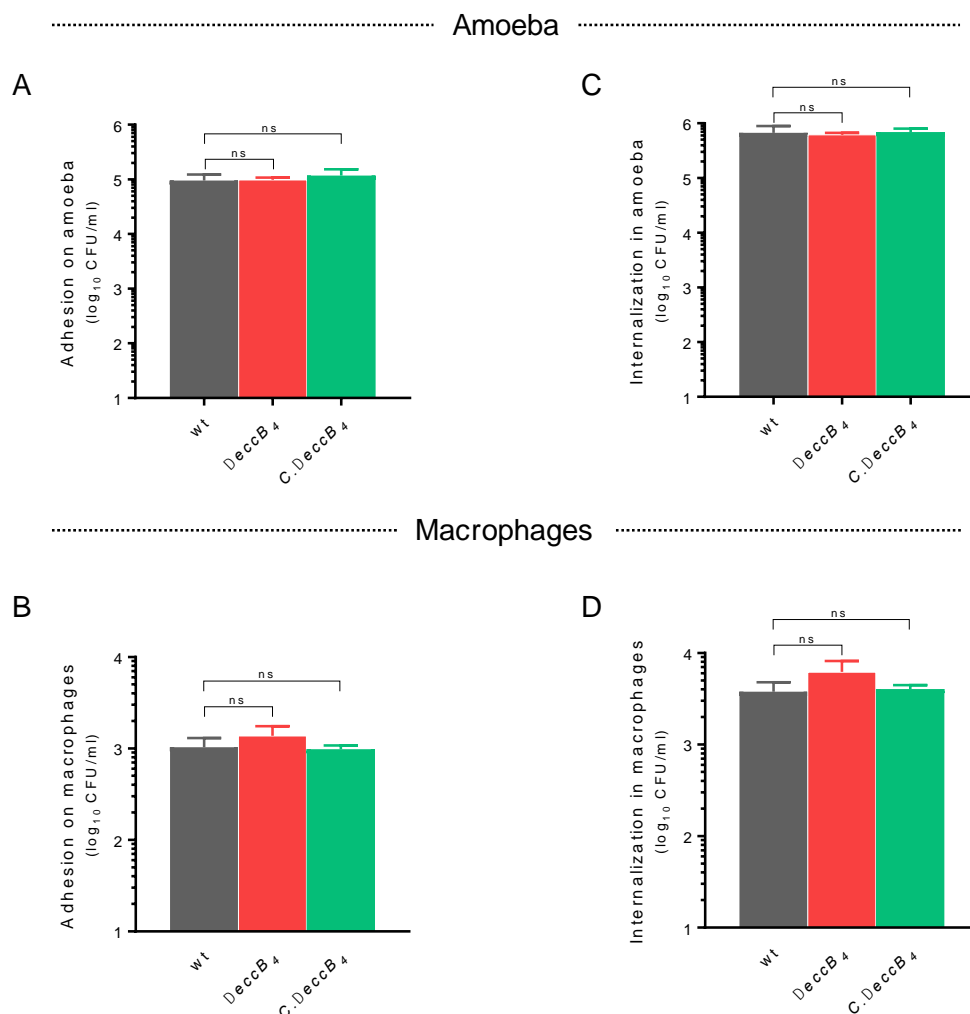

**Fig S4. Systematic thin layer liquid chromatographic (TLC) analysis reveal no changes in cell wall lipid compositions between *M. abscessus*  $\Delta eccB_4$  mutants and wild type strains.** (A) TLC analyses of apolar and polar lipids. Solvent systems used were as follows: A: petroleum ether / ethyl acetate 98:2 run thrice (first dimension), petroleum ether / acetone 98:2 (second dimension); B: petroleum ether acetone 92:8 run thrice (first dimension), toluene / acetone 95:5 (second dimension); C: chloroform / methanol 96:4 (first dimension), toluene acetone 80:20 (second dimension); D: chloroform / methanol / water 100:14:0.8 (first dimension), chloroform / acetone / methanol / water 50:60:2.5:3 (second dimension); E: chloroform / methanol / water 60:30:6 (first dimension), chloroform / acetic acid / methanol / water 40:25:3:6 (second dimension). (B) TLC analyses of methyl esterified fatty acids and mycolic acids. The solvent system was petroleum ether / acetone 95:5.

Fig.S4

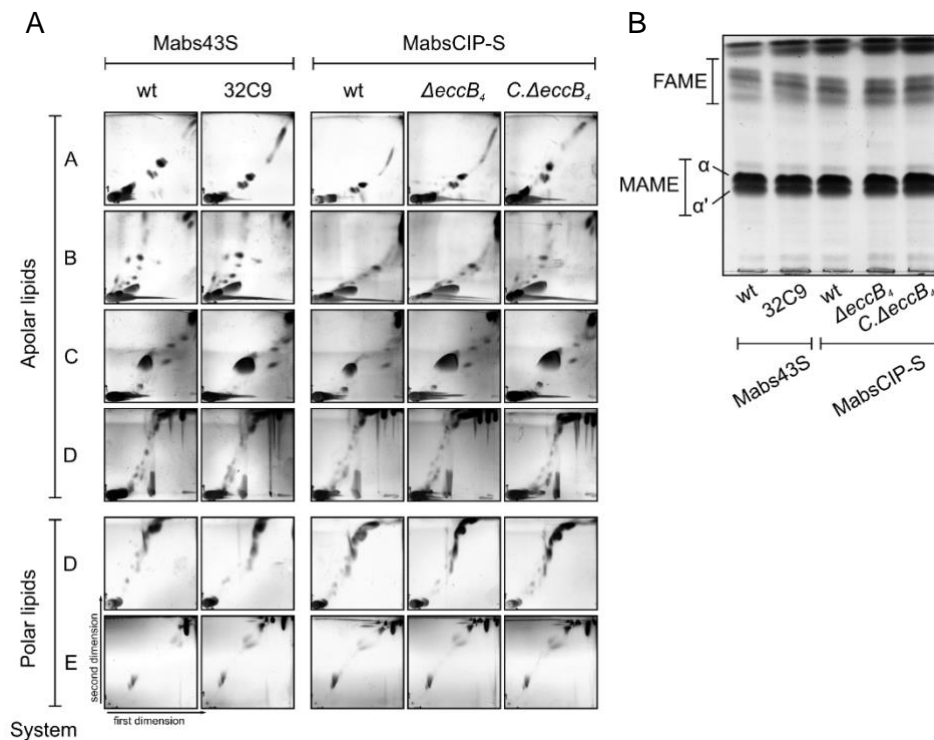

**Fig S5. EccB<sub>4</sub>-dependant secretome** (A) Proteomic analysis of concentrated supernatants from wild-type (wt) and  $\Delta eccB_4$  mutants. The figure represents the volcano plots for finding significant and not significant proteins using *t* test. The below table represents the results concerning EccB<sub>4</sub>, EsxT and EsxU (referred as ESAT-6 like proteins). A fold-change  $\geq 2$  was found for EccB<sub>4</sub> and EsxT although the fold change was considered non significant. (B) Left: His-EsxT (*Mab\_3753c*) detection using a Histidine Tag antibody in different bacterial compartments: cytosol, plama membrane (Pl. mb) and cell wall, and in the supernatant (Snt) of wild-type (wt),  $\Delta eccB_4$  mutant. Right: quantification of His-Esx-T band intensity (ImageJ software). (C) Red Ponceau stain of the different bacterial compartments (as in B).

Fig. S5

A

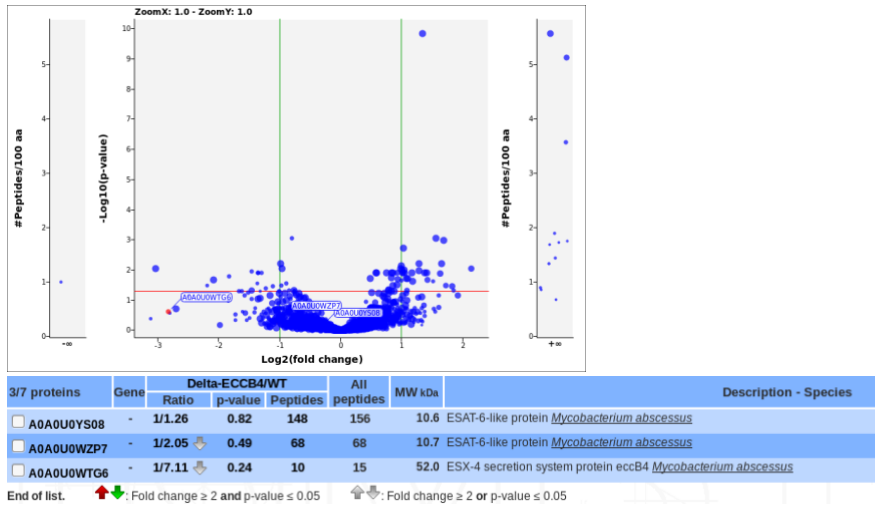

B

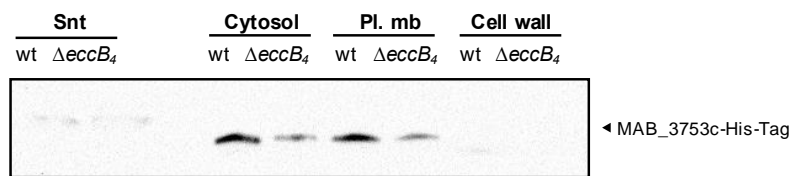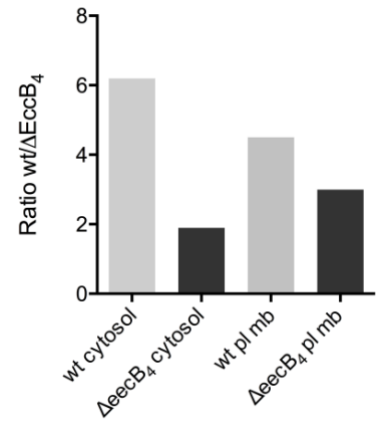

C

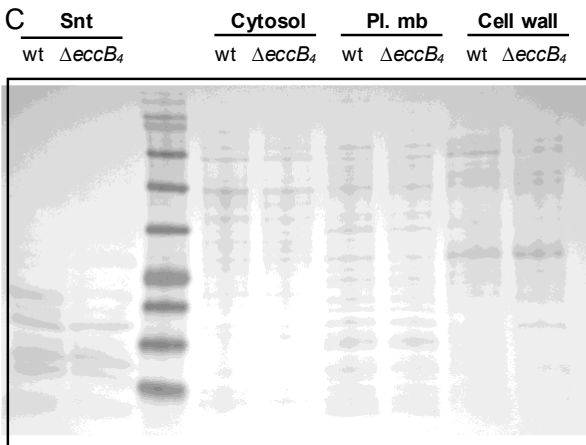

Supplement: pnas.1713195115.sapp.pdf [file pnas.1713195115.sapp.pdf]
